# Supplementary material for: In situ7Li-NMR analysis of lithium metal surface deposits with varying electrolyte compositions and concentrations
Source: Royal Society of Chemistry journal article supplement (doi:10.1039/c9cp05334d), 2019-01-01
Supplement: c9cp05334d1.pdf [file c9cp05334d1.pdf]

## Supporting Information

Table S1:  $R_1$  and  $R_2$  of symmetrical Li||Li coin cells with 1-PF<sub>6</sub>-C, 1-TFSI-C, 1-TFSI-E and 3-TFSI-E after various days under OCV conditions.

|       |     |                                 |                     |                     |                     |
|-------|-----|---------------------------------|---------------------|---------------------|---------------------|
| $R_1$ | Day | 1-PF <sub>6</sub> -C / $\Omega$ | 1-TFSI-C / $\Omega$ | 1-TFSI-E / $\Omega$ | 3-TFSI-E / $\Omega$ |
|       | 0   | 6 $\pm$ 1                       | 4 $\pm$ 1           | 9 $\pm$ 7           | 10 $\pm$ 2          |
|       | 1   | 5 $\pm$ 1                       | 3 $\pm$ 1           | 9 $\pm$ 8           | 12 $\pm$ 1          |
|       | 5   | 5 $\pm$ 1                       | 3 $\pm$ 1           | 9 $\pm$ 6           | 12 $\pm$ 1          |
|       | 8   | 14 $\pm$ 1                      | 3 $\pm$ 1           | 3 $\pm$ 1           | 8 $\pm$ 4           |

  

|       |     |                                 |                     |                     |                     |
|-------|-----|---------------------------------|---------------------|---------------------|---------------------|
| $R_2$ | Day | 1-PF <sub>6</sub> -C / $\Omega$ | 1-TFSI-C / $\Omega$ | 1-TFSI-E / $\Omega$ | 3-TFSI-E / $\Omega$ |
|       | 0   | 391 $\pm$ 63                    | 105 $\pm$ 12        | 140 $\pm$ 5         | 138 $\pm$ 13        |
|       | 1   | 540 $\pm$ 133                   | 96 $\pm$ 1          | 235 $\pm$ 9         | 174 $\pm$ 20        |
|       | 5   | 706 $\pm$ 71                    | 84 $\pm$ 11         | 333 $\pm$ 61        | 164 $\pm$ 1         |
|       | 8   | 838 $\pm$ 188                   | 79 $\pm$ 5          | 366 $\pm$ 95        | 158 $\pm$ 11        |

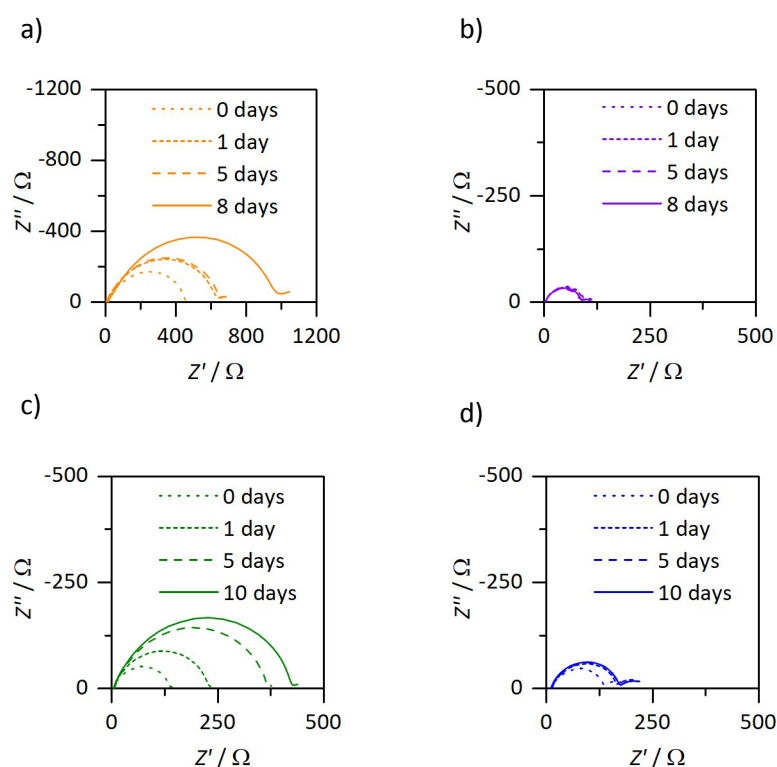

Figure S1: Impedance development of symmetrical Li||Li coin cells under open circuit voltage conditions containing electrolyte a) 1-PF<sub>6</sub>-C (1 M LiPF<sub>6</sub> in EC:DEC (3:7)), b) 1-TFSI-C (1 M LiTFSI in EC:DEC (3:7)), c) 1-TFSI-E (1 M LiTFSI in DME:DOL (1:1)), and d) 3-TFSI-E (3 M LiTFSI in DME:DOL (1:1)).

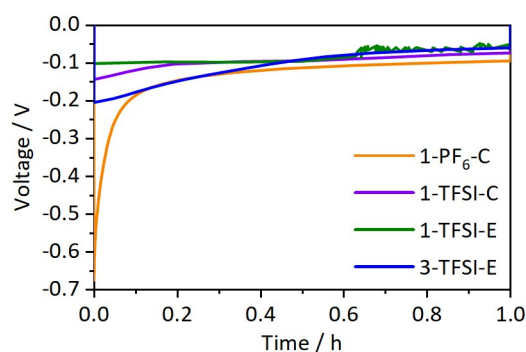

Figure S2: Development of the overvoltage of the first discharge step at a current density of  $0.5 \text{ mA cm}^{-2}$  in symmetrical Li||Li thin film pouch cells containing 1-PF<sub>6</sub>-C (1 M LiPF<sub>6</sub> in EC:DEC, 3:7, orange), 1-TFSI-C (1 M LiTFSI in EC:DEC, 3:7, purple), 1-TFSI-E (1 M LiTFSI in DME:DOL, 1:1, green), and 3-TFSI-E (3 M LiTFSI in DME:DOL, 1:1, blue), respectively.

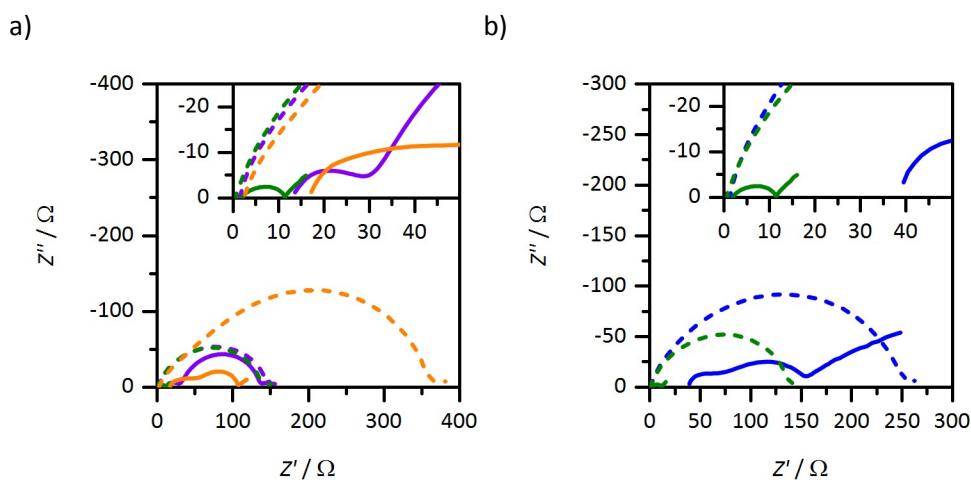

Figure S3: Impedance development of symmetrical Li||Li thin film pouch cells containing 1-PF<sub>6</sub>-C (1 M LiPF<sub>6</sub> in EC:DEC, 3:7, orange), 1-TFSI-C (1 M LiTFSI in EC:DEC, 3:7, purple), 1-TFSI-E (1 M LiTFSI in DME:DOL, 1:1, green), and 3-TFSI-E (3 M LiTFSI in DME:DOL, 1:1, blue) before (dashed) and after (solid) 300 cycles at  $0.5 \text{ mA cm}^{-1}$ .

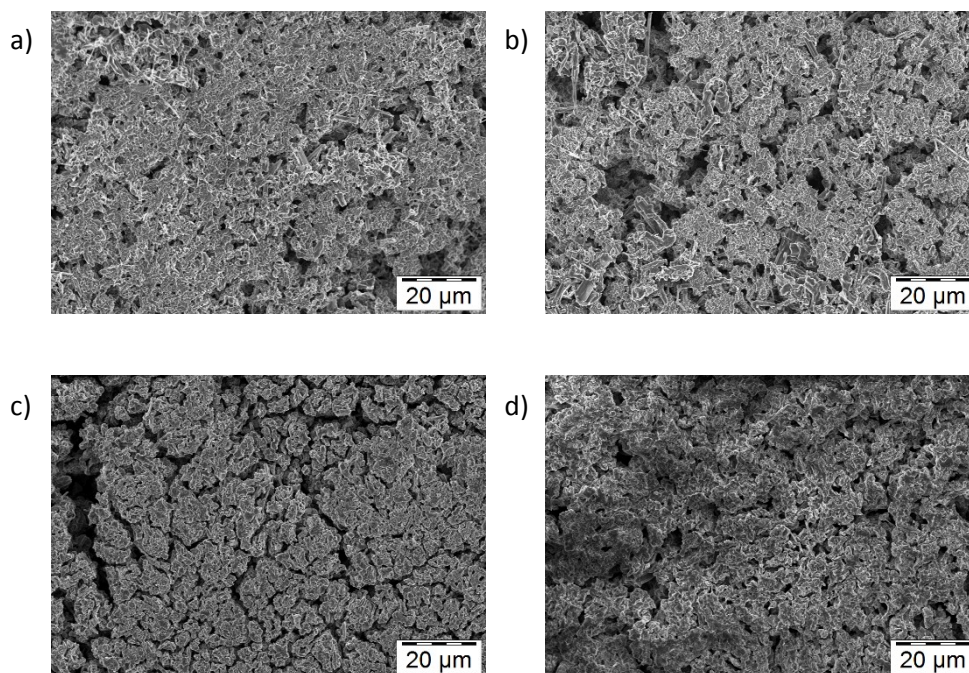

Figure S4: SEM images of lithium electrodes (WE) after 300 cycles at a current density of  $0.5 \text{ mA cm}^{-2}$  in symmetrical Li||Li thin film pouch cells with a) 1-PF<sub>6</sub>-C, b) 1-TFSI-C, c) 1-TFSI-E and d) 3-TFSI-E.

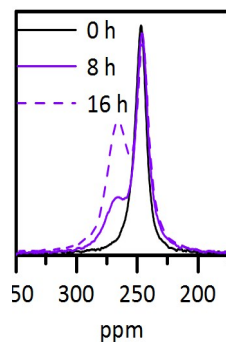

Figure S5: <sup>7</sup>Li-NMR spectrum of a Li||Li thin film pouch cell containing 1-TFSI-C after 0 hour (one peak at 246 ppm), 8 hours (one peak at 246 ppm, one peak at 268 ppm) and 16 hours (one peak at 246 ppm, one peak at 266 ppm).

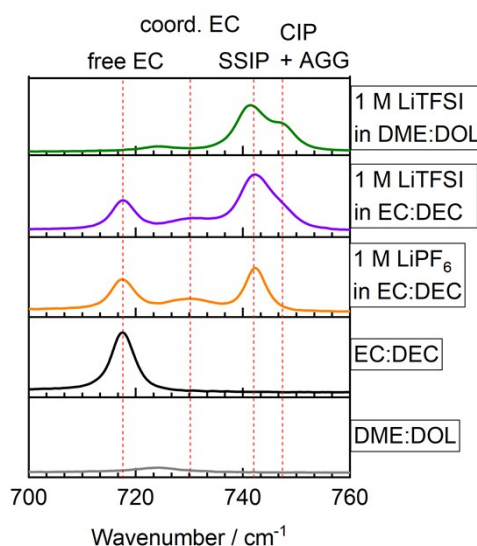

Figure S6: Raman spectra between 700  $\text{cm}^{-1}$  and 800  $\text{cm}^{-1}$  of DME:DOL (1:1, grey), EC:DEC (3:7, black), 1-PF<sub>6</sub>-C (1 M LiPF<sub>6</sub> in EC:DEC, 3:7, orange), 1-TFSI-C (1 M LiTFSI in EC:DEC, 3:7, purple), and 1-TFSI-E (1 M LiTFSI in DME:DOL, 1:1, green). Both, uncoordinated TFSI<sup>-</sup> and uncoordinated PF<sub>6</sub><sup>-</sup> are visible at 740 to 742  $\text{cm}^{-1}$  while the coordinated anion is shifted to higher wavenumbers.

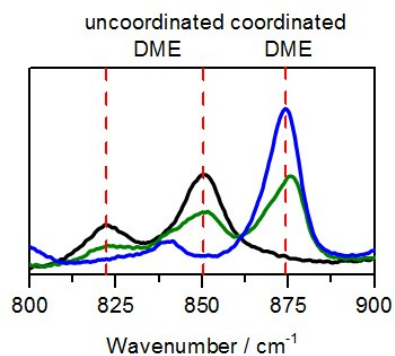

Figure S7: Raman spectra between  $800\text{ cm}^{-1}$  and  $900\text{ cm}^{-1}$  of DME:DOL (1:1, black), 1-TFSI-E (1 M LiTFSI in DME:DOL, 1:1, green) and 3-TFSI-E (3 M LiTFSI in DME:DOL, 1:1, blue).

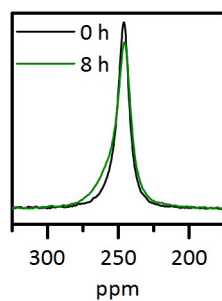

Figure S8:  $^7\text{Li}$ -NMR spectrum of a  $\text{Li} \parallel \text{Li}$  thin film pouch cell containing 1-TFSI-E after 0 and 8 hours, cycled with the application of an external pressure.
